# Supplementary material for: A novel Au/electroactive poly(amic acid) composite as an effective catalyst for p-nitrophenol reduction
Source: Royal Society of Chemistry journal article supplement (doi:10.1039/d1ra05347g), 2021-01-01
Supplement: d1ra05347g1.pdf [file d1ra05347g1.pdf]

## A novel Au/electroactive ploy(amic acid) composite as an effective catalyst of p-nitrophenol reduction

Guan-Hui Lai <sup>a</sup>, Tsao-Cheng Huang <sup>b</sup>, Bi-Sheng Huang <sup>a</sup>, and Yi-Chen Chou <sup>\*a</sup>

<sup>a</sup> Department of Cosmetic Science, Providence University, 43301 Taichung, Taiwan.

<sup>b</sup> Department of Chemistry, Chung Yuan Christian University, 32023 Chung Li, Taiwan

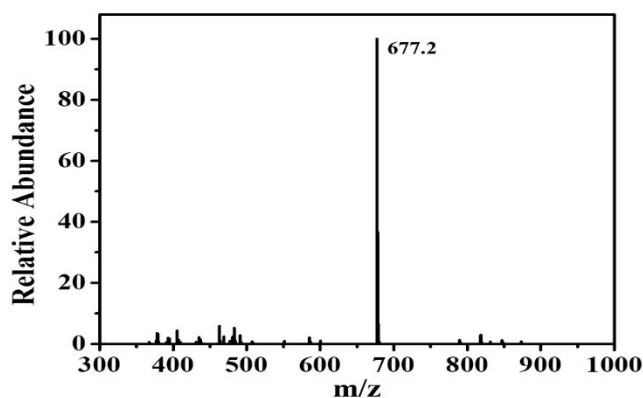

Fig. S1. LC-Mass of EPAA oligomer.

<sup>1</sup>H NMR (*d*<sub>6</sub>-DMSO):  $\delta=12.58$  (br, 2H, due to carboxylic acid),  $\delta= 10.23-10.21$  (m, 2H, due to sec amide),  $\delta=8.05-6.86$  (2H, due to sec amine),  $\delta=7.975$  (dd, 2H,  $J=8$ , 4Hz, due to H<sub>2</sub>, H<sub>2'</sub>),  $\delta=7.66-7.43$  (m, 6H, due to Ar),  $\delta= 7.22-7.20$  (m, 14H, due to Ar),  $\delta=6.81-6.75$  (m, 2H, due to Ar)

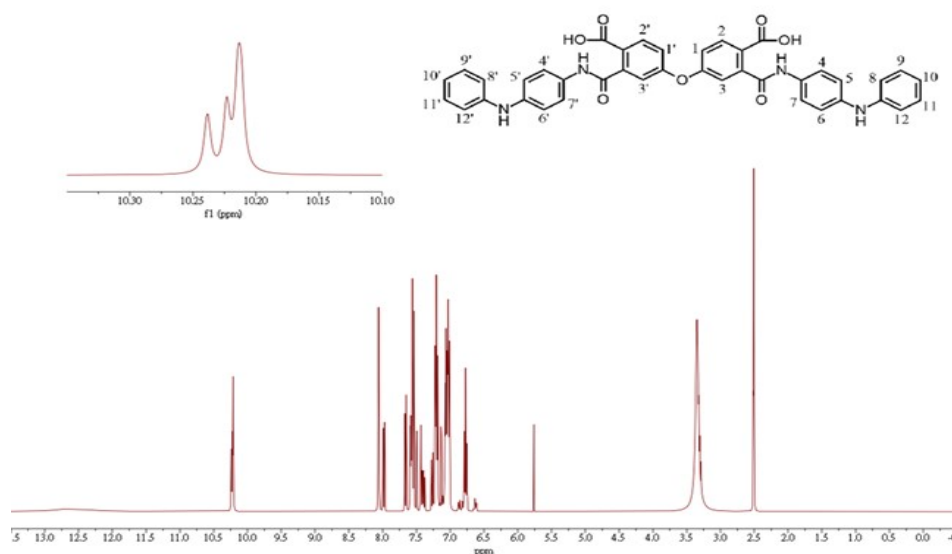

Fig. S2. <sup>1</sup>H NMR of EPAA oligomer.

$^1\text{H}$  NMR ( $d_6$ -DMSO):  $\delta=10.49$  (br, 1H, due to carboxylic acid),  $\delta=10.33$  (br, 1H, due to carboxylic acid),  $\delta= 10.22$ - $10.13$  (m, 2H, due to sec amide),  $\delta=8.05$ - $6.86$  (28H, due to Ar)

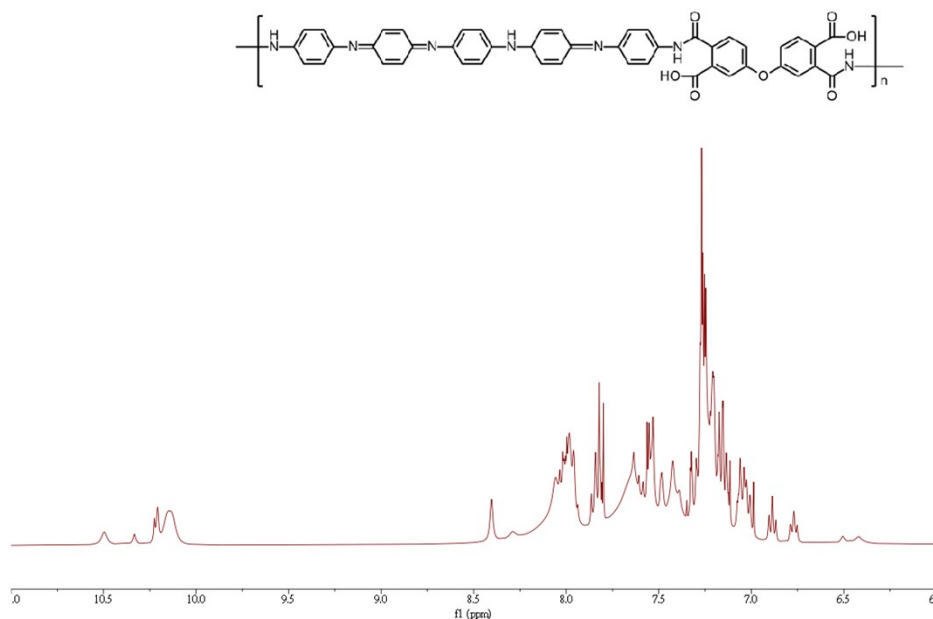

Fig. S3.  $^1\text{H}$  NMR of EPAA.

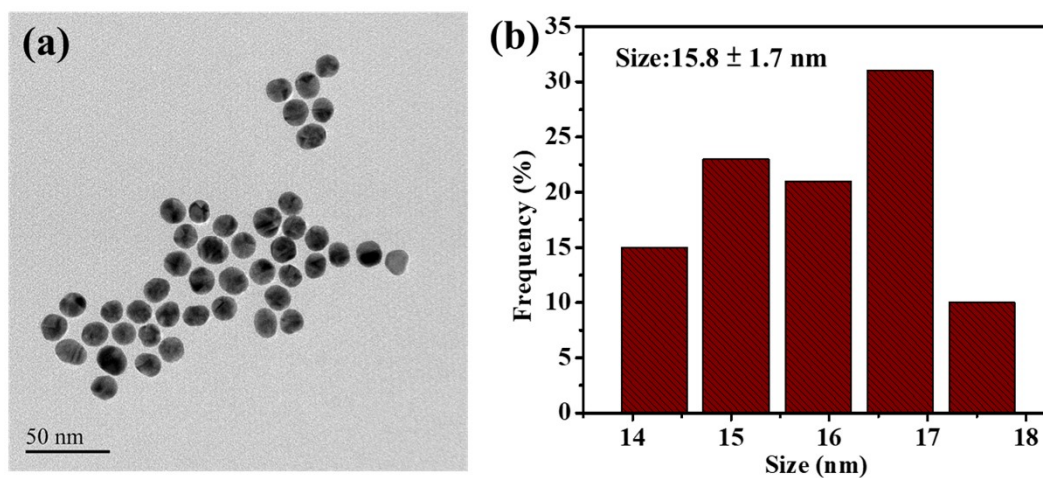

Fig. S4. (a) TEM image of Au nanoparticles and (b) the particle size distribution of the Au nanoparticles.
